# Supplementary material
Source: MDPI journal article supplement (https://www.mdpi.com/1999-4907/13/8/1295)
Supplement: s1 [file s1]

## Supplementary Material

Table S1. Botanical identification of open-grown-trees in the Cerrado Biome.

| Botanical Family/Scientific Name                            | Tree Frequency | Crown Geometric Shapes |
|-------------------------------------------------------------|----------------|------------------------|
| <u>Anacardiaceae</u>                                        |                |                        |
| <i>Astronium graveolens</i> Jacq.                           | 1              | 3                      |
| <i>Lithraea molleoides</i> (Vell.) Engl.                    | 1              | 1                      |
| <i>Tapirira guianensis</i> Aubl.                            | 3              | 2                      |
| <u>Annonaceae</u>                                           |                |                        |
| <i>Annona montana</i> Macfad.                               | 4              | 2, 4                   |
| <u>Apocynaceae</u>                                          |                |                        |
| <i>Aspidosperma macrocarpon</i> Mart.                       | 1              | 2                      |
| <i>Aspidosperma parvifolium</i> A.DC.                       | 4              | 2                      |
| <i>Aspidosperma</i> sp.                                     | 1              | 2                      |
| <i>Hancornia speciosa</i> Gomes                             | 2              | 1                      |
| <u>Araliaceae</u>                                           |                |                        |
| <i>Didymopanax macrocarpum</i> (Cham. and Schltdl.) Frodin  | 1              | 3                      |
| <u>Asteraceae</u>                                           |                |                        |
| <i>Piptocarpha rotundifolia</i> (Less.) Baker               | 1              | 3                      |
| <u>Bignoniaceae</u>                                         |                |                        |
| <i>Cybistax antisyphilitica</i> (Mart.) Mart.               | 1              | 5                      |
| <i>Handroanthus albus</i> (Cham.) Mattos                    | 6              | 2, 4, 5                |
| <i>Handroanthus avellanadae</i> (Lorentz ex Griseb.) Mattos | 2              | 2, 3                   |
| <i>Zeyheria tuberculosa</i> (Vell.) Bureau ex Verl.         | 4              | 2, 4                   |
| <u>Boraginaceae</u>                                         |                |                        |
| <i>cordia trichotoma</i> (Vell.) Arráb. ex Steud.           | 3              | 5                      |
| <u>Caryocaraceae</u>                                        |                |                        |
| <i>Caryocar brasiliense</i> Cambess.                        | 13             | 2, 3, 4, 5             |
| <u>Chrysobalanaceae</u>                                     |                |                        |
| <i>Licania apetala</i> (E.Mey.) Fritsch                     | 1              | 2                      |
| <u>Combretaceae</u>                                         |                |                        |
| <i>Terminalia argentea</i> Mart. and Zucc.                  | 3              | 2                      |
| <i>Terminalia glabrescens</i> Mart.                         | 2              | 3                      |
| <u>Ebenaceae</u>                                            |                |                        |
| <i>Diospyros lasiocalyx</i> (Mart.) B.Walln.                | 1              | 2                      |
| <u>Fabaceae</u>                                             |                |                        |
| <i>Anadenanthera macrocarpa</i> (Benth.) Brenan             | 6              | 2, 3                   |
| <i>Bowdichia virgilioides</i> Kunth                         | 17             | 2, 3, 4                |
| <i>Copaifera langsdorffii</i> Desf.                         | 3              | 1, 2, 3                |

|                                                               |    |            |
|---------------------------------------------------------------|----|------------|
| <i>Dimorphandra mollis</i> Benth.                             | 2  | 2          |
| <i>Enterolobium gummiferum</i> (Mart.) J.F.Macbr.             | 2  | 3          |
| <i>Hymenaea stigonocarpa</i> Mart. ex Hayne                   | 3  | 2          |
| <i>Leptolobium dasycarpum</i> Vogel                           | 3  | 1, 3       |
| <i>Leptolobium elegans</i> Vogel                              | 2  | 3          |
| <i>Plathymenia reticulata</i> Benth.                          | 11 | 2, 3, 4    |
| <i>Senna multijuga</i> (Rich.) H.S.Irwin and Barneby          | 1  | 1          |
| <i>Stryphnodendron adstringens</i> (Mart.) Coville            | 1  | 2          |
| <u>Lamiaceae</u>                                              |    |            |
| <i>Aegiphila integrifolia</i> Cham.                           | 2  | 2          |
| <u>Lauraceae</u>                                              |    |            |
| <i>Ocotea spixiana</i> (Nees) Mez                             | 2  | 2, 3       |
| <u>Lecythidaceae</u>                                          |    |            |
| <i>Cariniana estrellensis</i> (Raddi) Kuntze                  | 1  | 2          |
| <u>Loganiaceae</u>                                            |    |            |
| <i>Strychnos pseudoquina</i> A.St.-Hil.                       | 1  | 2          |
| <u>Lythraceae</u>                                             |    |            |
| <i>Lafoensia pacari</i> A.St.-Hil.                            | 5  | 2, 3, 4    |
| <u>Malpighiaceae</u>                                          |    |            |
| <i>Byrsonima coccolobifolia</i> Kunth                         | 1  | 2          |
| <u>Malvaceae</u>                                              |    |            |
| <i>Ceiba speciosa</i> (A.St.-Hil.) Ravenna                    | 1  | 2          |
| <i>Eriotheca gracilipes</i> (K.Schum.) A.Robyns               | 5  | 2, 3, 4    |
| <i>Eriotheca pubescens</i> (Mart. and Zucc.) Schott and Endl. | 1  | 2          |
| <i>Luehea divaricata</i> Mart. and Zucc.                      | 1  | 4          |
| <i>Pseudobombax tomentosum</i> (Mart.) A.Robyns               | 1  | 1          |
| <u>Meliaceae</u>                                              |    |            |
| <i>Cedrela fissilis</i> Vell.                                 | 3  | 2, 4       |
| <u>Moraceae</u>                                               |    |            |
| <i>Maclura tinctoria</i> (L.) D.Don ex Steud.                 | 4  | 1, 2       |
| <u>Myrtaceae</u>                                              |    |            |
| <i>Eugenia dysenterica</i> (Mart.) DC.                        | 1  | 1          |
| <i>Myrcia tomentosa</i> (Aubl.) DC.                           | 1  | 1          |
| <u>Primulaceae</u>                                            |    |            |
| <i>Myrsine gardneriana</i> A.DC.                              | 11 | 1, 2, 4, 5 |
| <u>Rhamnaceae</u>                                             |    |            |
| <i>Rhamnidium elaeocarpum</i> Reissek                         | 5  | 1, 2       |
| <u>Rutaceae</u>                                               |    |            |
| <i>Zanthoxylum rhoifolium</i> Lam.                            | 3  | 2, 4       |
| <i>Zanthoxylum riedelianum</i> Engl.                          | 1  | 2          |

Sapindaceae

*Matayba guianensis* Aubl.

2

2, 4

|                                                         |     |               |
|---------------------------------------------------------|-----|---------------|
| <u>Sapotaceae</u>                                       |     |               |
| <i>Chrysophyllum marginatum</i> (Hook. and Arn.) Radlk. | 4   | 1, 2, 3, 5    |
| <i>Pouteria ramiflora</i> (Mart.) Radlk.                | 1   | 2             |
| <u>Solanaceae</u>                                       |     |               |
| <i>Solanum lycocarpum</i> A.St.-Hil.                    | 1   | 1             |
| <u>Urticaceae</u>                                       |     |               |
| <i>Cecropia pachystachya</i> Trécul                     | 1   | 3             |
| <u>Vochysiaceae</u>                                     |     |               |
| <i>Qualea grandiflora</i> Mart.                         | 25  | 1, 2, 3, 4, 5 |
| <i>Qualea multiflora</i> Mart.                          | 1   | 3             |
| <i>Qualea parviflora</i> Mart.                          | 4   | 2, 3, 4       |
| -                                                       |     |               |
| <i>IN</i>                                               | 5   | 1, 2, 4       |
| Total                                                   | 200 |               |

Table S2. Growth space considering the size of the potential crown diameter in open-growing trees.

| D <sub>eq</sub> | CD   | GS     | N   | G     |
|-----------------|------|--------|-----|-------|
| 5               | 6.2  | 0.0030 | 388 | 0.76  |
| 10              | 7.3  | 0.0042 | 275 | 2.16  |
| 15              | 8.4  | 0.0056 | 207 | 3.66  |
| 20              | 9.5  | 0.0071 | 162 | 5.10  |
| 25              | 10.6 | 0.0088 | 131 | 6.44  |
| 30              | 11.6 | 0.0106 | 109 | 7.69  |
| 35              | 12.6 | 0.0125 | 92  | 8.87  |
| 40              | 13.6 | 0.0145 | 79  | 9.98  |
| 45              | 14.6 | 0.0166 | 69  | 11.03 |
| 50              | 15.5 | 0.0188 | 61  | 12.04 |
| 55              | 16.4 | 0.0211 | 55  | 13.03 |
| 60              | 17.2 | 0.0233 | 49  | 13.98 |
| 65              | 18.1 | 0.0257 | 45  | 14.93 |
| 70              | 18.9 | 0.0280 | 41  | 15.86 |
| 75              | 19.7 | 0.0304 | 38  | 16.79 |
| 80              | 20.4 | 0.0327 | 35  | 17.73 |
| 85              | 21.1 | 0.0351 | 33  | 18.67 |
| 90              | 21.8 | 0.0374 | 31  | 19.62 |
| 95              | 22.5 | 0.0398 | 29  | 20.58 |
| 100             | 23.1 | 0.0421 | 27  | 21.57 |
| 105             | 23.7 | 0.0443 | 26  | 22.57 |
| 110             | 24.3 | 0.0465 | 25  | 23.60 |
| 115             | 24.9 | 0.0486 | 24  | 24.66 |
| 120             | 25.4 | 0.0507 | 23  | 25.76 |
| 125             | 25.9 | 0.0527 | 22  | 26.89 |
| 130             | 26.4 | 0.0546 | 21  | 28.07 |
| 135             | 26.8 | 0.0564 | 20  | 29.28 |
| 140             | 27.2 | 0.0582 | 20  | 30.55 |
| 145             | 27.6 | 0.0598 | 19  | 31.87 |
| 150             | 28.0 | 0.0614 | 19  | 33.25 |
| 155             | 28.3 | 0.0628 | 18  | 34.69 |
| 160             | 28.6 | 0.0641 | 18  | 36.20 |
| 165             | 28.8 | 0.0653 | 18  | 37.79 |
| 170             | 29.1 | 0.0664 | 17  | 39.46 |
| 175             | 29.3 | 0.0674 | 17  | 41.21 |
| 180             | 29.5 | 0.0682 | 17  | 43.06 |
| 185             | 29.6 | 0.0690 | 17  | 45.02 |
| 190             | 29.8 | 0.0695 | 17  | 47.08 |

|     |      |        |    |       |
|-----|------|--------|----|-------|
| 195 | 29.9 | 0.0700 | 16 | 49.27 |
| 200 | 29.9 | 0.0703 | 16 | 51.59 |
| 205 | 30.0 | 0.0705 | 16 | 54.06 |
| 210 | 30.0 | 0.0706 | 16 | 56.68 |
| 215 | 30.0 | 0.0705 | 16 | 59.48 |
| 220 | 29.9 | 0.0703 | 16 | 62.46 |
| 225 | 29.8 | 0.0699 | 17 | 65.66 |

---

## Modeling using artificial neural networks (ANNs)

Multi-layer perceptron (MLP) ANNs (Figure S1) with only one hidden layer were used to train the data [107]. The starting from the data normalization according to two types of intervals [0;1] according to Equation (S1).

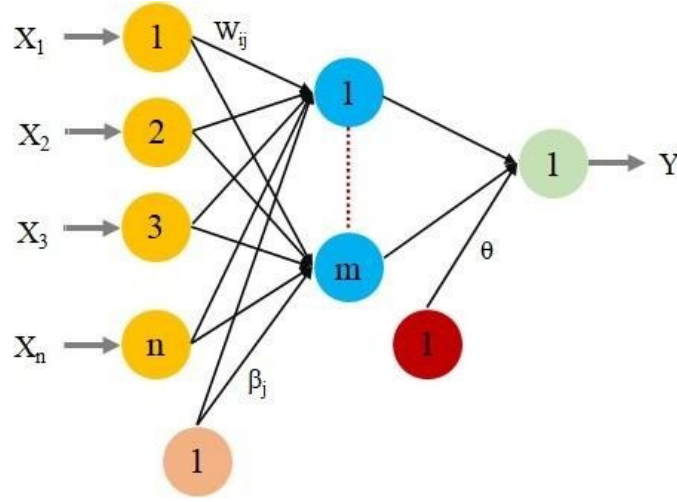

Figure S1. Basic structure of an MLP.

Therefore, it was considered that  $Y$  = estimation of the value of the dependent variable;  $X_i$  = input value of the  $i$ -th independent variable;  $w_{ij}$  = connection weight between the  $i$ -th input neuron and the  $j$ -th neuron of the hidden layer;  $\beta_j$  = bias value of the  $j$ -th neuron of the hidden layer;  $v_j$  = connection weight between the  $j$ -th neuron of the hidden layer and the output neuron;  $\theta$  = bias value of the output neuron. After, Equation S2 was applied.

$$\Delta = \frac{UL - IL}{X_{\text{maximum}} - X_{\text{minimum}}} \quad (S1)$$

$$X_{\text{equal}} = IL - \Delta \times X_{\text{minimum}} + \Delta \times X_i \quad (S2)$$

where  $X_i$  is the value to be equalized,  $X_{\text{minimum}}$  is the lowest value of the dataset,  $X_{\text{maximum}}$  is the highest value of the dataset,  $UL$  is upper limit, and  $IL$  is inferior limit.

The modeling was considered the development of six models of artificial neural networks (CD [ANN1],..., CD [ANN6]), with the input variables inserted in the sequence [ $X_1$  = Deq (cm);  $X_2$  = D<sub>03</sub> (cm);

$X_3 = C_L$  (m);  $X_4 = D_{07}$  (cm);  $X_5 = C_{BH}$  (m);  $X_6 = C_{GS}$ ]. For each input variable, the insertion of three neurons in the hidden layer (m) was considered. Thus, the CD [ANN6] model presented 18 neurons in the hidden layer (m = 18) (see Table S3). In the output layer (Y), the value of the crown diameter (CD) was obtained, in meters. The training the networks, the logistic activation function (Equation S3) was used in the hidden layer and linear (Equation S4) in the output layer.

$$f(x) = \frac{1}{1 + e^{-x}} \quad (S3)$$

$$g(x) = x \quad (S4)$$

The sigmoid activation function has this name because its curve resembles the letter “S”; this function returns only positive values, in a range from 0 to 1 [108]. The identity activation function has greater simplicity compared to the others and has a linear output.

The ANN<sub>s</sub> prediction is possible through the mathematical expression described for MLP (Equation S5), as

follows:

$$Y = g \left( \theta + \sum_{j=1}^m v_j \left[ \sum_{i=1}^n f(w_{ij}X_i + \beta_j) \right] \right) \quad (S5)$$

where  $Y$  = estimation of the value of the dependent variable;  $X_i$  = input value of the  $i$ -th independent variable;  $w_{ij}$  = connection weight between the  $i$ -th input neuron and the  $j$ -th neuron of the hidden layer;  $\beta_j$  = bias value of the  $j$ -th neuron of the hidden layer;  $v_j$  = connection weight between the  $j$ -th neuron of the hidden layer and the output neuron;  $\theta$  = bias value of the output neuron;  $f(.)$  = hidden layer activation function;  $g(.)$  = output activation function.



Table S3. Parameters (synaptic weights and biases) of the ANN<sub>s</sub> selected to describe the crown diameter of open-grown-trees in the Cerrado Biome

| Description                                                                             | Simbology        | CD [ANN1]   | CD [ANN2] | CD [ANN3]  | CD [ANN4]  | CD [ANN5]  | CD [ANN6] |
|-----------------------------------------------------------------------------------------|------------------|-------------|-----------|------------|------------|------------|-----------|
|                                                                                         |                  | Parameters* |           |            |            |            |           |
| Connection weight between the i-th input neuron and the j-th neuron of the hidden layer | W <sub>11</sub>  | -52.285701  | 0.441175  | -0.368468  | 0.788746   | 0.352935   | 0.008867  |
|                                                                                         | W <sub>12</sub>  | 6.067180    | 0.024614  | -1.308982  | -29.926575 | 1.197814   | -1.283944 |
|                                                                                         | W <sub>13</sub>  | -2.556499   | -1.122738 | 2.948249   | -1.614895  | -0.018677  | -3.375115 |
|                                                                                         | W <sub>14</sub>  |             | 5.499550  | -3.962290  | 1.266468   | 1.480785   | 1.776070  |
|                                                                                         | W <sub>15</sub>  |             | 1.054599  | -6.307936  | -0.954370  | -1.130997  | -0.844790 |
|                                                                                         | W <sub>16</sub>  |             | 1.545627  | -1.003498  | 0.934919   | -0.285297  | -0.234891 |
|                                                                                         | W <sub>17</sub>  |             |           | -3.536656  | -1.251683  | 0.801147   | -1.006638 |
|                                                                                         | W <sub>18</sub>  |             |           | -27.327223 | 0.645551   | 1.549380   | 0.757662  |
|                                                                                         | W <sub>19</sub>  |             |           | -0.462741  | -0.382814  | 0.108774   | 0.729109  |
|                                                                                         | W <sub>110</sub> |             |           |            | -1.091274  | 2.783036   | -0.905680 |
|                                                                                         | W <sub>111</sub> |             |           |            | 1.259159   | -28.835061 | -1.631331 |
|                                                                                         | W <sub>112</sub> |             |           |            | 3.237491   | 0.968321   | -0.092664 |
|                                                                                         | W <sub>113</sub> |             |           |            |            | 0.236701   | -1.008296 |
|                                                                                         | W <sub>114</sub> |             |           |            |            | -0.569685  | -0.525780 |
|                                                                                         | W <sub>115</sub> |             |           |            |            | -0.232053  | 0.376922  |
|                                                                                         | W <sub>116</sub> |             |           |            |            |            | 14.383766 |
|                                                                                         | W <sub>117</sub> |             |           |            |            |            | -2.366025 |
|                                                                                         | W <sub>118</sub> |             |           |            |            |            | 1.119998  |
|                                                                                         | W <sub>21</sub>  |             | 1.240771  | 0.152024   | -1.565146  | -0.016037  | -0.390417 |
|                                                                                         | W <sub>22</sub>  |             | 1.986934  | -0.270411  | 12.241726  | -0.443947  | 0.537074  |
|                                                                                         | W <sub>23</sub>  |             | -5.836951 | -0.956231  | -0.620027  | -1.558500  | -4.866437 |
|                                                                                         | W <sub>24</sub>  |             | 2.251971  | 6.144645   | 1.256208   | 1.198452   | 0.191175  |
|                                                                                         | W <sub>25</sub>  |             | 7.687187  | -43.095923 | 0.153504   | -1.199291  | 0.506829  |
|                                                                                         | W <sub>26</sub>  |             | 0.230043  | -0.628444  | -2.613559  | -1.365705  | -0.052260 |
|                                                                                         | W <sub>27</sub>  |             |           | 3.997805   | 18.295995  | 0.694334   | 0.707511  |
|                                                                                         | W <sub>28</sub>  |             |           | 8.067229   | 1.977717   | 2.191541   | 1.902660  |
|                                                                                         | W <sub>29</sub>  |             |           | -0.212183  | -1.038435  | 0.148147   | -0.113810 |
|                                                                                         | W <sub>210</sub> |             |           |            | 0.034761   | -0.887761  | -0.794508 |
|                                                                                         | W <sub>211</sub> |             |           |            | 1.873751   | 5.540455   | 0.866439  |
|                                                                                         | W <sub>212</sub> |             |           |            | 0.039941   | -0.366681  | -0.992417 |
|                                                                                         | W <sub>213</sub> |             |           |            |            | -0.646160  | -1.550012 |
|                                                                                         | W <sub>214</sub> |             |           |            |            | -0.424988  | -0.194124 |
|                                                                                         | W <sub>215</sub> |             |           |            |            | -0.593907  | 1.949137  |
|                                                                                         | W <sub>216</sub> |             |           |            |            |            | -3.168511 |
|                                                                                         | W <sub>217</sub> |             |           |            |            |            | 0.568626  |
|                                                                                         | W <sub>218</sub> |             |           |            |            |            | 0.753377  |
|                                                                                         | W <sub>31</sub>  |             |           | -1.058894  | -1.893249  | -0.089171  | -0.173472 |
|                                                                                         | W <sub>32</sub>  |             |           | -0.441188  | 17.934741  | 0.034670   | 1.294303  |

|      |           |           |            |           |
|------|-----------|-----------|------------|-----------|
| W33  | -0.301711 | -0.203926 | 2.352748   | 4.318236  |
| W34  | -4.762883 | 0.302595  | 0.853023   | 0.017615  |
| W35  | -0.542065 | -1.697443 | 2.196633   | 0.268517  |
| W36  | 0.114667  | 0.780587  | 2.813368   | -1.678827 |
| W37  | 3.546779  | -9.598029 | -1.160846  | -0.089845 |
| W38  | 6.870947  | 0.488596  | 1.815828   | 0.448170  |
| W39  | -0.732768 | -0.891396 | 0.917626   | -0.396973 |
| W310 |           | -1.919412 | 0.701266   | -1.225497 |
| W311 |           | -2.229371 | 12.791242  | 0.815772  |
| W312 |           | 0.451052  | -25.805858 | -0.358592 |
| W313 |           |           | -1.485516  | -9.838083 |
| W314 |           |           | -0.764018  | 0.519500  |
| W315 |           |           | 0.759926   | 0.597432  |
| W316 |           |           |            | -6.922471 |
| W317 |           |           |            | 0.605203  |
| W318 |           |           |            | -0.595918 |
| W41  |           | -0.436547 | 0.342353   | -1.428986 |
| W42  |           | 7.658021  | -0.377858  | 0.054484  |
| W43  |           | -0.526418 | 0.027108   | -7.129777 |
| W44  |           | -0.296933 | 0.331817   | -1.991782 |
| W45  |           | -1.415039 | 0.751963   | 1.602134  |
| W46  |           | -1.786652 | 0.244533   | -0.597560 |
| W47  |           | 48.255409 | 0.135645   | 0.101074  |
| W48  |           | -0.636502 | 0.854073   | -0.939687 |
| W49  |           | -4.150908 | 0.871344   | 0.757750  |
| W410 |           | 1.995379  | 0.437633   | -0.892106 |
| W411 |           | -0.378686 | -30.069369 | 0.929289  |
| W412 |           | -0.225500 | 31.231198  | 0.140579  |
| W413 |           |           | 0.773047   | 10.245140 |
| W414 |           |           | 0.081473   | -2.173056 |
| W415 |           |           | 0.482071   | 0.442091  |
| W416 |           |           |            | -8.103308 |
| W417 |           |           |            | -0.894157 |
| W418 |           |           |            | -0.595494 |
| W51  |           |           | 0.897456   | 1.249620  |
| W52  |           |           | -0.928073  | -1.066804 |
| W53  |           |           | 0.469211   | -1.638531 |
| W54  |           |           | 0.749753   | -0.890046 |
| W55  |           |           | -0.674494  | -0.593003 |
| W56  |           |           | -1.081294  | -0.846941 |
| W57  |           |           | -1.774760  | 0.670528  |
| W58  |           |           | -2.417113  | -1.261176 |

|                                                      |              |           |           |           |           |           |           |
|------------------------------------------------------|--------------|-----------|-----------|-----------|-----------|-----------|-----------|
|                                                      | W59          |           |           |           |           | 0.180632  | 0.290387  |
|                                                      | W510         |           |           |           |           | 0.858854  | -1.068239 |
|                                                      | W511         |           |           |           |           | -7.161013 | 0.293048  |
|                                                      | W512         |           |           |           |           | 10.555245 | -1.234492 |
|                                                      | W513         |           |           |           |           | -0.139305 | 8.808620  |
|                                                      | W514         |           |           |           |           | -0.252607 | -0.297507 |
|                                                      | W515         |           |           |           |           | -0.441234 | 0.662599  |
|                                                      | W516         |           |           |           |           |           | -0.991709 |
|                                                      | W517         |           |           |           |           |           | -1.993560 |
|                                                      | W518         |           |           |           |           |           | 1.610218  |
|                                                      | W61          |           |           |           |           |           | -1.253547 |
|                                                      | W62          |           |           |           |           |           | -0.351199 |
|                                                      | W63          |           |           |           |           |           | 1.462390  |
|                                                      | W64          |           |           |           |           |           | -0.485148 |
|                                                      | W65          |           |           |           |           |           | 0.772739  |
|                                                      | W66          |           |           |           |           |           | 0.793475  |
|                                                      | W67          |           |           |           |           |           | -0.049888 |
|                                                      | W68          |           |           |           |           |           | 1.444210  |
|                                                      | W69          |           |           |           |           |           | -1.316608 |
|                                                      | W610         |           |           |           |           |           | 1.646875  |
|                                                      | W611         |           |           |           |           |           | -0.295740 |
|                                                      | W612         |           |           |           |           |           | 0.976105  |
|                                                      | W613         |           |           |           |           |           | 2.545005  |
|                                                      | W614         |           |           |           |           |           | -0.378622 |
|                                                      | W615         |           |           |           |           |           | -1.582336 |
|                                                      | W616         |           |           |           |           |           | -0.551052 |
|                                                      | W617         |           |           |           |           |           | 0.398931  |
|                                                      | W618         |           |           |           |           |           | -0.862134 |
| Bias value of the j-th neuron of the<br>hidden layer | $\beta_1$    | 10.106684 | -1.409141 | -0.573714 | -0.228742 | -0.749953 | 0.853635  |
|                                                      | $\beta_2$    | -0.806814 | -1.521088 | 0.416304  | -1.586991 | 0.557637  | 0.556086  |
|                                                      | $\beta_3$    | 1.998134  | -0.638708 | 0.603434  | 0.691158  | 0.079495  | -2.755697 |
|                                                      | $\beta_4$    |           | -1.304119 | 2.367323  | -0.608529 | -0.565994 | 1.326871  |
|                                                      | $\beta_5$    |           | -2.130729 | 33.999751 | 1.112479  | -0.684473 | -0.020924 |
|                                                      | $\beta_6$    |           | -1.689605 | -1.011302 | -0.787537 | 1.132387  | -0.046967 |
|                                                      | $\beta_7$    |           |           | 1.060184  | -3.075630 | 0.604845  | -1.654833 |
|                                                      | $\beta_8$    |           |           | -2.680666 | -0.832502 | -1.195707 | -0.481469 |
|                                                      | $\beta_9$    |           |           | -0.469019 | 0.016202  | -1.347570 | 0.996778  |
|                                                      | $\beta_{10}$ |           |           |           | -0.771936 | 0.095406  | 0.798270  |
|                                                      | $\beta_{11}$ |           |           |           | -0.373772 | 2.937064  | 0.036856  |
|                                                      | $\beta_{12}$ |           |           |           | 0.708892  | -0.358073 | 0.433929  |
|                                                      | $\beta_{13}$ |           |           |           |           | 1.329899  | -0.128215 |
|                                                      | $\beta_{14}$ |           |           |           |           | 0.515573  | -1.353280 |

|                                 |                 |           |           |           |           |           |           |
|---------------------------------|-----------------|-----------|-----------|-----------|-----------|-----------|-----------|
|                                 | $\beta_{15}$    |           |           |           |           | 0.874171  | 0.574683  |
|                                 | $\beta_{16}$    |           |           |           |           |           | -1.594957 |
|                                 | $\beta_{17}$    |           |           |           |           |           | -0.229665 |
|                                 | $\beta_{18}$    |           |           |           |           |           | -0.986161 |
| Connection weights              | v <sub>1</sub>  | 0.100666  | 0.601329  | -0.246043 | 1.453558  | -0.774367 | 0.303532  |
|                                 | v <sub>2</sub>  | 0.980560  | 1.064435  | -0.356684 | 0.144953  | -1.207625 | 1.292379  |
|                                 | v <sub>3</sub>  | -0.769734 | -0.167223 | 0.220761  | -0.562051 | 1.889052  | -0.890050 |
|                                 | v <sub>4</sub>  |           | 1.029324  | -0.170448 | 0.101620  | -0.881039 | 0.668162  |
|                                 | v <sub>5</sub>  |           | -0.717272 | -0.249255 | -0.406641 | -1.831858 | 0.190370  |
|                                 | v <sub>6</sub>  |           | 0.137631  | -0.734862 | 0.485442  | -1.136634 | 0.152851  |
|                                 | v <sub>7</sub>  |           |           | 0.766223  | 0.100875  | 1.337729  | -1.351368 |
|                                 | v <sub>8</sub>  |           |           | -0.817319 | 1.183491  | 0.260184  | 0.695761  |
|                                 | v <sub>9</sub>  |           |           | -0.042120 | 0.238218  | 1.128355  | 0.044892  |
|                                 | v <sub>10</sub> |           |           |           | -0.513955 | 0.710968  | 0.014531  |
|                                 | v <sub>11</sub> |           |           |           | 0.151038  | -0.139021 | -0.291733 |
|                                 | v <sub>12</sub> |           |           |           | 0.741138  | -0.141518 | -0.676431 |
|                                 | v <sub>13</sub> |           |           |           |           | -0.360573 | -0.288902 |
|                                 | v <sub>14</sub> |           |           |           |           | -1.071674 | -0.945386 |
|                                 | v <sub>15</sub> |           |           |           |           | 1.255069  | -1.188071 |
|                                 | v <sub>16</sub> |           |           |           |           |           | -0.683157 |
|                                 | v <sub>17</sub> |           |           |           |           |           | -1.112205 |
|                                 | v <sub>18</sub> |           |           |           |           |           | 1.337282  |
| Bias value of the output neuron | $\theta$        | 0.295600  | -0.395647 | 0.261993  | -1.047888 | 0.559285  | 0.151516  |

\*Input variables used were as follows:  $D_{eq}$  is diameter measured 1.3 m;  $D_{03}$  is diameter measured 0.3 m;  $C_L$  is crown length;  $D_{07}$  is diameter measured 0.7 m;  $C_{BH}$  is crown base height; and  $C_{GS}$  is crown geometric shapes.

[illegible]

```

for(i in seq(1,6)){
  DeltaInput = (1-0)/(norma_values[paste('input',i,sep="'),'maximum']-norma_values[paste('input',i,sep="'),'minimum'])
  norma = 0 - DeltaInput*norma_values[paste('input',i,sep="'),'minimum']+DeltaInput*input[i]
  norma_input = append(norma_input,norma)
}
#weights
ann = paste('ANN',n,sep="")
total_summation = c()
for(i in seq(1,n*3)){
  summation = (weights[paste('v',i,sep="'),ann]*
    (((1/(1+exp(-(weights[paste('w1',i,sep="'),ann]*norma_input[1]+weights[paste('w2',i,sep="'),ann]*norma_input[2]+
      weights[paste('w3',i,sep="'),ann]*norma_input[3]+weights[paste('w4',i,sep="'),ann]*norma_input[4]+
      weights[paste('w5',i,sep="'),ann]*norma_input[5]+weights[paste('w6',i,sep="'),ann]*norma_input[6]+
      weights[paste('b',i,sep="'),ann]))))))))

total_summation = append(total_summation,summation)
}
g=sum(total_summation)+weights['teta',ann]
DeltaOutput=(1-0)/(norma_values['output','maximum']-norma_values['output','minimum'])
Output=(g-0+DeltaOutput*norma_values['output','minimum'])/DeltaOutput
return(Output)
}
#input --> [X1 = Deg; X2 = D03; X3 = CL; X4 = D07; X5 = CBH; X6 = CGS]
# ANN1
round(ann(c(6.0)),2)
# ANN2 ... ANN5
# ANN6
round(ann(c(6.0,7.2,2.8,6.4,1.2,4)),2)

```

## References

107. Haykin, S. *Redes Neurais - Princípios e Prática*; Engel, P.M., Ed.; 2nd ed.; Bookman: Porto Alegre, 2001; Vol. 7659; ISBN 85-7307-718-2.
108. Heaton, J. *Introduction to the Math of Neural Networks*; WordsRU.com, Ed.; 1st ed.; Heaton Research, Inc, 2012; ISBN 978-1475190878.
